# Supplementary material for: The Orbiting Carbon Observatory-2: First 18 months of Science Data Products
Source: Copernicus journal article supplement (doi:10.5194/amt-2016-247), 2016-09-23
Supplement: Supplementary file [file amt-2016-247-AC3-supplement.pdf]

# The Orbiting Carbon Observatory-2: First 18 months of Science Data Products

Annmarie Eldering<sup>1</sup>, Chris W. O'Dell<sup>2</sup>, Paul O. Wennberg<sup>3</sup>, David Crisp<sup>1</sup>, Michael R. Gunson<sup>1</sup>, Camille Viatte<sup>3</sup>, Charles Avis<sup>1</sup>, Amy Braverman<sup>1</sup>, Rebecca Castano<sup>1</sup>, Albert Chang<sup>1</sup>, Lars Chapsky<sup>1</sup>, Cecilia Cheng<sup>1</sup>, Brian Connor<sup>4</sup>, Lan Dang<sup>1</sup>, Gary Doran<sup>1</sup>, Brendan Fisher<sup>1</sup>, Christian Frankenberg<sup>1,2</sup>, Dejian Fu<sup>1</sup>, Robert Granat<sup>1</sup>, Jonathan Hobbs<sup>1</sup>, Richard A. M. Lee<sup>1</sup>, Lukas Mandrake<sup>1</sup>, James McDuffie<sup>1</sup>, Charles E. Miller<sup>1</sup>, Vicky Myers<sup>1</sup>, Vijay Natraj<sup>1</sup>, Denis O'Brien<sup>2</sup>, Gregory B. Osterman<sup>1</sup>, Fabiano Oyafuso<sup>1</sup>, Vivienne H. Payne<sup>1</sup>, Harold R. Pollock<sup>1</sup>, Igor Polonsky<sup>3,5</sup>, Coleen M. Roehl<sup>3</sup>, Robert Rosenberg<sup>1</sup>, Florian Schwandner<sup>1</sup>, Mike Smyth<sup>1</sup>, Vivian Tang<sup>1</sup>, Thomas E. Taylor<sup>2</sup>, Cathy To<sup>1</sup>, Debra Wunch<sup>3,6</sup>, Jan Yoshimizu<sup>1</sup>

[1] Jet Propulsion Laboratory, California Institute of Technology, Pasadena, CA

[2] Cooperative Institute for Research in the Atmosphere, Colorado State University, Fort Collins, CO

[3] Department of Geology and Planetary Sciences, California Institute of Technology, Pasadena, CA

[4] BC Scientific Consulting, Stony Brook, NY, USA

[5] currently at Atmospheric and Environmental Research, Inc., Lexington, MA

[6] as of December 2015, University of Toronto, Department of Physics, Toronto, Canada

Correspondence to: A. Eldering (Annmarie.Eldering@jpl.nasa.gov)

## Abstract

The Orbiting Carbon Observatory-2 (OCO-2) is the first National Aeronautics and Space Administration (NASA) satellite designed to measure atmospheric carbon dioxide (CO<sub>2</sub>) with the accuracy, resolution, and coverage needed to quantify CO<sub>2</sub> fluxes (sources and sinks) on regional scales. OCO-2 was successfully launched on 2 July 2014, and has gathered more than two years of observations. The v7/v7R operational data products from September 2014 to January 2016 are discussed here. On monthly time scales, 7 to 12% of these measurements are sufficiently cloud and aerosol free to yield estimates of the column-averaged atmospheric CO<sub>2</sub> dry air mole fraction, X<sub>CO2</sub>, that pass all quality tests. During the first year of operations, the observing strategy, instrument calibration, and retrieval algorithm were optimized to improve both the data yield and the accuracy of the products. With these changes, global maps of X<sub>CO2</sub> derived from the OCO-2 data are revealing some of the most robust features of the atmospheric carbon cycle. This includes X<sub>CO2</sub> enhancements co-located with intense fossil fuel emissions in eastern U.S. and eastern China, which are most obvious between October and December, when the north-south X<sub>CO2</sub> gradient is small. Enhanced X<sub>CO2</sub> coincident with biomass burning in the Amazon, central Africa, and Indonesia is also evident in this season. In May and June, when the north-south X<sub>CO2</sub> gradient is largest, these sources are less apparent in global maps. During this part of the year, OCO-2 maps show a more than 10 ppm reduction in X<sub>CO2</sub> across the northern hemisphere, as photosynthesis by the land biosphere rapidly absorbs CO<sub>2</sub>. As the carbon cycle science community continues to analyze these OCO-2 data, information on regional-scale sources (emitters) and sinks (absorbers) which impart X<sub>CO2</sub> changes on the order of 1 ppm, as well as far more subtle features, will emerge from this high resolution, global data set.

Deleted: <sup>4</sup>

Deleted: <sup>5</sup>

Deleted: 4

Deleted: joined the 705 km Afternoon Constellation on 3 August 2014

## 2 1 Introduction

3 Human activities including fossil fuel combustion, cement production, and deforestation are now adding almost 40 billion tons of  
4 carbon dioxide (CO<sub>2</sub>) to the atmosphere each year (c.f. Le Quéré et al., 2015). If all of this CO<sub>2</sub> remained in the atmosphere, the  
5 atmospheric CO<sub>2</sub> concentration would increase by more than one percent (1%) per year. Interestingly, precise measurements  
6 collected by a growing global network of greenhouse gas monitoring stations over the past 60 years indicate that less than half of  
7 this CO<sub>2</sub> remains airborne (Dlugokencky and Tans, 2015). The rest is being absorbed by the oceans and the land biosphere.  
8 Measurements of the partial pressure of CO<sub>2</sub> in seawater collected over this period indicate that almost a quarter of the CO<sub>2</sub> emitted  
9 by human activities is being absorbed by the ocean (c.f. Takahashi et al. 2009), where it contributes to ocean acidification. For  
10 mass balance reasons, another 10 billion tons of CO<sub>2</sub> must be absorbed by processes on land, whose identity and location are less  
11 well understood. Some studies have attributed this absorption to tropical (Schimel et al., 2015), or Eurasian temperate (Reuter et  
12 al., 2014) forests, while others indicate that these areas are just as likely to be net sources as net sinks of CO<sub>2</sub> (Chevallier et al.,  
13 2014). The efficiency of these natural land and ocean sinks also appears to vary dramatically from year to year (Le Quéré et al.,  
14 2015). Some years, they absorb CO<sub>2</sub> equivalent to almost all of that emitted by human activities, while in other years, they absorb  
15 very little. Because the identity, location, and processes controlling these natural sinks are not well constrained, it is not clear that  
16 they will continue to reduce the rate of atmospheric CO<sub>2</sub> buildup by half in the future (Schimel et al., 2015). This introduces a  
17 major source of uncertainty in predictions of the rate of future CO<sub>2</sub> increases, and their effect on the climate (Friedlingstein et al.,  
18 2006; Arora et al., 2013).

19 Measurements from the network of ground-based greenhouse gas stations accurately track the global atmospheric CO<sub>2</sub> budget and  
20 its trends. Remote sensing of the column-averaged CO<sub>2</sub> dry air mole fraction (X<sub>CO2</sub>) from space is intended to provide finer spatial  
21 coverage enabling smaller scale *sources* emitting CO<sub>2</sub> into the atmosphere and natural *sinks* absorbing this gas at the Earth's surface  
22 to be better quantified. Surface weighted X<sub>CO2</sub> estimates can be retrieved from high resolution spectroscopic observations of  
23 reflected sunlight in near infrared CO<sub>2</sub> and O<sub>2</sub> bands (c.f. Rayner and O'Brien, 2001; Crisp et al., 2004; Buchwitz et al., 2006;  
24 O'Dell et al., 2012). This is a challenging space-based remote sensing observation because even the largest regional CO<sub>2</sub> sources  
25 and sinks produce changes in the background X<sub>CO2</sub> distribution no larger than 2%, and most are smaller than 0.25% (1 part per  
26 million (ppm) out of the background 400 ppm) (c.f. Miller et al., 2007).

27 The European Space Agency (ESA) Envisat SCanning Imaging Absorption SpectroMeter for Atmospheric CHartographY  
28 (SCIAMACHY) (Burrows et al., 1995) and Japanese Greenhouse Gases Observing Satellite (GOSAT) Thermal And Near infrared  
29 Sensor for carbon Observation Fourier Transform Spectrometer (TANSO-FTS) (Nakajima et al., 2010) were the first satellite  
30 instruments designed to exploit this measurement approach. SCIAMACHY enabled retrieval of column averaged CO<sub>2</sub> and methane  
31 (X<sub>CH4</sub>) measurements over the sunlit hemisphere from 2002 to 2012. Spectra from TANSO-FTS have been used to produce X<sub>CO2</sub>  
32 and X<sub>CH4</sub> observations since April 2009. These data have provided an important proof of concept, and are beginning to yield new  
33 insights into the carbon cycle (Feng et al., 2016; Guerlet et al., 2013; Wunch et al., 2013; Schneising et al., 2014), but improvements  
34 in sensitivity, resolution, and coverage are still needed.

35 The Orbiting Carbon Observatory-2 (OCO-2) is the first NASA satellite designed to measure atmospheric CO<sub>2</sub> columns with the  
36 accuracy, resolution, and coverage needed to detect CO<sub>2</sub> sources and sinks on regional scales over the globe. OCO-2 is a  
37 replacement for the Orbiting Carbon Observatory (Crisp et al., 2004, 2008) which was lost in 2009, when its launch vehicle  
38 malfunctioned and failed to reach orbit. OCO-2 was successfully launched from Vandenberg Air Force Base in California on July  
39 2, 2014. Since September 6<sup>th</sup> of 2014, this instrument has been routinely returning almost one million soundings each day over the

1 sunlit hemisphere. Optically thick clouds and aerosols preclude observations of the full atmospheric column, but 7 to 12% of these  
2 soundings are sufficiently cloud free to yield full-column estimates of  $X_{\text{CO}_2}$  with single-sounding random errors between 0.5 and  
3 1 ppm at solar zenith angles as large as 70 degrees.

4 Here we provide a brief introduction to the instrument and the mission operations to date, highlighting the global coverage,  
5 resolution, and precision of the dataset. We describe the overall flow of data in section 4 and some key results in terms of data  
6 quantity, quality, and features, with discussions of  $X_{\text{CO}_2}$  (section 4.3.1), data quality indicators (section 4.3.3 and 4.3.4), and overall  
7 data density (section 4.3.5). The trends in  $X_{\text{CO}_2}$  in space and time as seen from OCO-2 are discussed in section 5. This paper is one  
8 of a number of papers describing the OCO-2 mission and its early results. On-orbit calibration and validation of the Level-1  
9 radiances are described in Crisp et al. (2016ab). Details of the  $X_{\text{CO}_2}$  retrieval algorithm, including filtering and bias correction, are  
10 given in O'Dell et al. (2016), while the validation of  $X_{\text{CO}_2}$  via comparisons to the TCCON network are given in Wunch et al.  
11 (2016). Finally, analysis of the Solar-Induced Fluorescence (SIF) product derived from OCO-2's Oxygen-A band is described in  
12 Sun et al. (2016). Interested readers are advised to consult these references for details.

13  
14

## 15 2 The instrument

16 The instrument of OCO-2 is a three-band spectrometer, which measures reflected sunlight in three separate bands. The oxygen A-  
17 band (ABO2) measures absorption by molecular oxygen near  $0.76 \mu\text{m}$ , while two carbon dioxide bands, labeled here as the weak  
18 and strong  $\text{CO}_2$  bands (WCO2 and SCO2 hereafter), are located near  $1.6$  and  $2.0 \mu\text{m}$ , respectively. The instrument has 1016 spectral  
19 elements in each band, and 160 pixels are averaged in groups of  $\sim 20$  along the slit, creating eight spatial footprints. The instrument  
20 field of view creates footprints that are nominally  $1.25 \text{ km}$  in width, and the spacecraft motion spans  $\sim 2.4 \text{ km}$  of the ground in the  
21  $0.33$  seconds of integration time. The spacecraft rotates along the orbit, maintaining a constant angle between the plane defined by  
22 the instrument, the point observed on the ground, and the sun. As a result, the footprint shapes change during the orbit, from very  
23 narrow and long near the equator, to smaller and smaller aspect ratios, (approaching rectangular footprints) with increasing latitudes  
24 (see details in Crisp et al., 2016b). The rate of data collection results in approximately 1 million sets of 3 band measurements per  
25 day.

Deleted: nearly rectangular to very narrow swaths

26 The OCO-2 instrument collects data over very narrow spectral ranges, with a resolving power ( $\lambda/\Delta\lambda$ ) of roughly 19,000:1 in each  
27 band that reveals the trace gas spectral absorption lines. The spectral ranges for the  $\text{O}_2$ -A band, weak  $\text{CO}_2$ , and strong  $\text{CO}_2$  are  
28  $0.7576$  to  $0.7726$  microns,  $1.5906$  to  $1.6218$  microns, and  $2.0431$  to  $2.0834$  microns, respectively. Details of the spectral and  
29 radiometric calibration of the instrument are reported in Lee et al. (2016) and Rosenberg et al. (2016), respectively. On-orbit  
30 instrument performance is described in detail in Crisp et al. (2016a). Coincident measurements from the three channels are  
31 combined into “soundings” that are analysed with a “full-physics” retrieval algorithm to yield estimates of  $X_{\text{CO}_2}$  and other  
32 geophysical quantities (c.f. Boesch et al., 2006, 2011; O'Dell et al., 2012, 2016; Crisp et al., 2012).

33  
34

## 35 3 The observatory in space

36 The OCO-2 observatory was launched successfully from Vandenberg Air Force Base in California on July 2<sup>nd</sup>, 2014 at 2:56 am  
37 Pacific Daylight Time. During the 10 days following launch, the spacecraft team completed a functional check of both the

1 observatory and the instrument. The observatory was then maneuvered into its position in the 705 km Afternoon Constellation,  
2 also called the A-train, arriving on August 3<sup>rd</sup>, 2014. A number of atmospheric remote-sensing satellites fly in coordination in this  
3 constellation, such as the Moderate Resolution Imaging Spectrometer (MODIS) and Cloud-Aerosol Lidar with Orthogonal  
4 Polarization (CALIOP) which can be used for cross comparisons of clouds and radiances. After achieving the operational orbit,  
5 the instrument and focal planes were brought to and stabilized at their operational temperatures. During the more extensive in-  
6 orbit-checkout (IOC) of the instrument, measurements were collected to refine the geometric, radiometric, and spectral calibration.  
7 On August 6, 2014, the first spectral data were collected with the instrument at operating temperatures, and processed with  
8 calibration parameters from pre-launch calibration experiments. As reported in Basilio et al. (2014) this data showed high resolution  
9 with high signal to noise characteristics similar to the prelaunch measurements. Another critical activity during the IOC were lunar  
10 measurements that were used, in combination with data from coastal crossings, to determine the alignment of the spectrometers  
11 and derive the updated pointing coefficients. Calibration data collected during IOC were used to update the instrument gain  
12 coefficients, dark correction, and to update the map of bad pixels on the focal plane. This was completed on September 5, 2014.  
13 Data after that date is considered scientifically usable, as the instrument temperatures were stable, and the key radiometric  
14 parameters were up to date. The OCO-2 mission formally ended the IOC period on October 12, 2014.

15 As of the summer of 2016, the instrument and spacecraft are performing extremely well, and data collection continues. Crisp et al.  
16 (2016ab) provides details of data interruptions, which have been primarily driven by instrument operations.

17

### 18 **3.1 The observing strategy**

19 The observing strategy of the OCO-2 mission evolved over the first year. Initially, the strategy was to collect 16 days of nadir data,  
20 collecting data by measuring directly below the spacecraft, followed by 16 days of glint measurements, where the instrument is  
21 pointed towards the glint spot, to collect higher signal ocean data. This strategy was updated over time, and is illustrated in Figure  
22 1. The key changes were 1) the geometry of glint measurements, 2) changes to the frequency of alternating glint and nadir mode  
23 orbits, 3) changes to the geometry of nadir orbits, and 4) the specification of some orbit paths as perpetual glint measurements.

24 During early instrument checkout (Aug 7, 2014), the nominal 16-day nadir/glint pattern was disrupted after very high signals were  
25 observed during glint measurements. For the safety of the instrument, the observing mode was shifted to nadir measurements while  
26 the cause was investigated. We concluded that an incident of glint measurements over very still water, that may have had a layer  
27 of highly reflective material on its surface, was the cause of the high signal measurements (see Crisp et al. (2016b) for more  
28 discussion), and they posed no risk to the instrument, so glint data collection was restarted on September 8, 2014. In mid-September  
29 2014 it was recognized that the measurements were consistent with a polarization sensitivity that was rotated by 90 degrees from  
30 our expectations (again, see Crisp et al. (2016b)). To improve the signal to noise of the glint mode observations, particularly near  
31 the Brewster's angle, the spacecraft was yawed 30 degree during glint measurements after October 26, 2014. To provide more  
32 uniform temporal distribution of glint measurements over ocean, an additional change was made to the data collection beginning  
33 July 3, 2015. The nadir and glint data collection were changed to an orbit by orbit interleaving (one orbit nadir, one orbit glint, *ad*  
34 *infinitum*). Over a 32-day period, nadir and glint data are collected over the same set of locations as in the original 16 day alternating  
35 scheme, but the new approach does not have large time gaps in ocean data collection. In late October 2015, to reduce the  
36 temperature changes of the instrument when changing from glint to nadir, the nadir geometry was updated to collect data at the  
37 same 30-degree yaw as glint data are collected in. This allows for the collection of 3 to 5 glint orbits in a row between nadir orbits.  
38 With this change, orbits that are solely over water, such as the Pacific and Atlantic, can be measured in glint at all times. This type

1 of data collection was started on November 12, 2015, and it is expected that this approach will be used for the remainder of the  
2 mission. Figure 1 provides a calendar view of the observing strategy and data outages.

#### 4 Overall data flow

5 The overall flow of the data pipeline is illustrated in Figure 2. All data products except the so called ‘Lite files’ contain one granule  
6 of data, which is restricted to one mode (such as nadir, glint, target, or transition). A granule corresponds to a complete orbit of  
7 measurements except in the cases where the orbit includes a switch to target measurements. In these cases there are separate data  
8 product files for the target and the transition before and after the target. The data that are processed as they are collected are referred  
9 to as v7, or the forward processing stream. They use calibration coefficients that are predicted based on recent measurements. This  
10 dataset is created in the Science Data Operations System (SDOS) at JPL. The v7r refers to the retrospective data, or data processed  
11 with calibration coefficients based on measurements before, during, and after the measurement time period. This dataset is typically  
12 processed on supercomputer resources (NASA’s Pleiades and cloud computing resources).

13 The raw (L1a) measurements are geolocated, and the calibration coefficients are applied to generate geolocated, calibrated  
14 radiances (L1b) as discussed in Crisp et al. (2016a). These data are then passed to the preprocessors, which are used to identify the  
15 scenes that are most likely to be cloud free and successful in generating converged retrievals. One preprocessor routine also  
16 provides estimates of solar induced fluorescence (SIF). The  $X_{CO_2}$  retrievals are performed on a subset of data selected by the  
17 preprocessors outcomes. The v7 and v7r standard (L2Std) and diagnostic (L2Dia) products report these data, which include the  
18  $X_{CO_2}$  estimates. In a final step, a bias correction and data quality flag (warn level) are integrated, and each day of quality data is  
19 packaged into a single so-called ‘Lite file’ (further details in Section 4.3, and in Mandrake et al., 2015). All L1B, L2 and Lite  
20 products are delivered to the NASA Goddard Earth Science Data and Information Services Center (GES DISC) for distribution  
21 and archiving (<http://disc.sci.gsfc.nasa.gov/OCO-2>). The L1 and L2 products are described in greater detail in the OCO-2 Data  
22 Product User’s Guide and the L1B and L2 Algorithm Theoretical Basis Documents (ATBDs) and other documents, which are  
23 posted along with the products at the GES DISC (<http://disc.sci.gsfc.nasa.gov/OCO-2/documentation/oco-2-v7>) (Osterman et al.,  
24 2015; Crisp et al., 2014; Eldering et al., 2015; Mandrake et al., 2015).

#### 4.1 Calibrated radiances

25  
26 The “Level 1B” (L1B) product consists of full orbits or fractions of orbits of calibrated and geolocated spectral radiances from the  
27 ABO2, WCO2, and SCO2 channels. The details of the transformation of raw measurements into calibrated spectral radiances are  
28 discussed in the L1b Algorithm Theoretical Basis document (Eldering et al., 2015). The pre-flight spectral and radiometric  
29 calibration are discussed in Lee et al. (2016) and Rosenberg et al. (2016). The in-flight performance is discussed in detail in Crisp  
30 et al. (2016a). The L2 data products are not impacted by the calibration issues discussed in Crisp et al. (2016a) with the exception  
31 of time dependent radiometric correction factors that are now understood to be in error for the v7/v7r data, with an increasing error  
32 in time. This radiometric error has a magnitude of about 4% by 18 months into the mission, and is an error in the absolute  
33 radiometry, not a growing uncertainty on the radiances. Analysis of a set of test retrievals where this error was removed showed,  
34 that an absolute radiance error of 4% will impart an  $X_{CO_2}$  error of 0.22 ppm, 0.12 ppm, and 0.4 ppm in nadir land, glint land, and  
35 glint water measurements, respectively. This error is not addressed in the analysis presented here, where, data are used as provided  
36 in the v7/v7r files.

Deleted: s

Deleted: ,

## 2 4.2 Preprocessors

3 For the v7 and v7r OCO-2 dataset, the A-band (ABP) (Taylor et al., 2016) and IMAP-DOAS (IDP) preprocessors (Frankenberg et  
 4 al., 2011, 2012, 2014) were used for the selection of data to be processed to L2. To limit the demands on the computing system,  
 5 no more than 6% of data collected each day are processed to L2 in the v7 forward processing stream. The v7r processing stream  
 6 includes all data that meets pre-processing criteria, which is on average 17.9 % for glint data and 6.6% for nadir. Taylor et al (2016)  
 7 describes the preprocessor outcomes in detail. In summary, the A-band preprocessor compares the measured radiance spectra with  
 8 spectra calculated with a non-scattering forward model to test for the presence of clouds. The IDP also uses a non-scattering forward  
 9 model, but it is applied to the WCO2 and SCO2 bands independently. Ratios of the single band column retrievals are then analyzed  
 10 to identify scenes that are impacted by clouds and aerosols. As reported in Taylor et al (2016) the combined ABP and IDP OCO-2  
 11 preprocessors screen approximately 85-90% of the co-located data that MODIS reports to be cloudy, with overall global agreement  
 12 of ~85% between the two sensors. The regions of significant disagreement were found to be tropical and subtropical oceans and  
 13 desert land. Comparisons to CALIOP measurement of the vertical distribution of cloud optical thickness confirmed the conclusion  
 14 derived from simulations that the combined ABP and IDP preprocessors successfully identify high, optically thin clouds and  
 15 midlevel clouds and aerosols, but fail to identify contamination in about 25% of the cases of low, optically thick clouds and aerosols.  
 16 Additional pre-filters remove all land data south of 65S, and further limit the surface albedo in the O<sub>2</sub>-A band to less than 0.55 for  
 17 a rough proxy of the presence of snow and ice on the ground, which can cause the retrievals significant problems (O'Dell et al.,  
 18 2012).

19

## 20 4.3 Level 2 algorithm products

21 The OCO-2 project reports two key products at L2 (derived geophysical data at the spatial resolution of the measurement), the dry  
 22 air mole fraction of carbon dioxide ( $X_{CO_2}$ ) and solar induced fluorescence (SIF). As described in the preprocessor section, only a  
 23 subset of data are considered to be sufficiently cloud (and aerosol)-free (optical depths less than ~0.35 [as determined in the](#)  
 24 [preprocessors](#)) for the next step of processing in the L2 Full Physics algorithm, which produced the  $X_{CO_2}$  data product. The SIF  
 25 product is generated by the IDP preprocessors (Frankenberg et al., 2014). As described in Frankenberg et al., (2014), most of the  
 26 fluorescence signal is retained, even through moderate clouds (optical depths up to 5). As a consequence, SIF results are reported  
 27 for a much larger fraction of the OCO-2 observations compared to the  $X_{CO_2}$  product.

28 The OCO-2 retrievals for  $X_{CO_2}$  are created using the full physics algorithm that has been described previously (O'Dell, et al., 2012;  
 29 O'Dell et al., 2016). The retrieval algorithm is based on an optimal estimation scheme and an efficient radiative transfer technique  
 30 that accounts for multiple scattering and polarization effects. A standard cost function is minimized to find the state vector that  
 31 produces the maximum *a posteriori* probability. While the focus is the retrieval of  $X_{CO_2}$ , other parameters such as surface albedo,  
 32 aerosols, temperature, water vapor, and wind speed (for water surfaces only), are co-retrieved. Prior to the launch of OCO-2, this  
 33 algorithm was adapted for application to the GOSAT measurements, with these results reported in O'Dell et al. (2012) and Crisp  
 34 et al. (2012), and for OCO-2 it remains largely unchanged from what was reported in those papers.

35 The  $X_{CO_2}$  data are reported in the L2\_Standard files and the L2\_Diagnostic files, where the diagnostic files contain additional  
 36 information that may be useful for detailed assessment of the algorithm and for the modeling community (Osterman et al., 2015).  
 37 Examples of the additional information are the averaging kernels and the *a posteriori* covariance matrix,  $\hat{S}$ . In v7, the L2 Standard

1 and Diagnostic files, containing about 60,000 soundings per file, do not contain warn levels values which indicate data quality  
2 (Mandrake et al., 2013), nor has a bias correction been applied. This information is calculated subsequently and included in the  
3 Lite files described below.

4 A summary daily data product, referred to as the Lite files, is created, to simplify data volumes and data structures. Specific files  
5 for X<sub>CO2</sub> (Mandrake et al., 2015) and separately for SIF product contain one day of data per file (Frankenberg, 2015). For X<sub>CO2</sub> a  
6 bias correction is applied, warn levels are assigned, with all converged soundings included in the file.

#### 7 4.3.1 L2 X<sub>CO2</sub> results

8 The X<sub>CO2</sub> data record from OCO-2 now extends more than 18 months, and Figures 3, 4, and 5 show maps of these X<sub>CO2</sub>  
9 measurements. These maps illustrate averages over month long periods, so there are nadir and glint data in each panel. The data  
10 included in these maps and all that follow have been screened and have had the bias correction applied (v7rB Lite file data with  
11 the 0/1 data quality flag applied, see Mandrake et al., 2015). These two processes will be discussed in more detail in Sections 4.3.4  
12 and 4.3.6. As expected, these maps show the large annual changes in X<sub>CO2</sub>. CO<sub>2</sub> builds up over the Northern Hemisphere during  
13 winter, and then is rapidly removed from the atmosphere as spring arrives and the terrestrial ecosystem activity increases rapidly.  
14 This is most apparent in the month of June, when the decrease of X<sub>CO2</sub> over northern Asia is order 10 ppm. The overall gradients  
15 of a few ppm from north to south are apparent in the data, as well as the secular increase in CO<sub>2</sub> from October 2014 to March 2016.  
16 Other features are apparent in the data maps, such as the higher CO<sub>2</sub> concentrations over the Eastern US and China between October  
17 and December (see Figures 3 and 5), when the overall global X<sub>CO2</sub> gradient is small. Enhanced X<sub>CO2</sub> coincident with biomass  
18 burning in the Amazon, central Africa, and Indonesia (Van Der Werf et al., 2010) is also obvious in these figures.

Deleted: n

19 The latitudinal coverage of the v7r dataset is also apparent from these maps. Data selection for processing through L2 relies on  
20 screening from the preprocessor results, as well as limitations on geographical extent. Analysis of the preprocessor data (Taylor et  
21 al., 2016) show that a large fraction of these higher latitude data are marked as cloudy, which is in agreement with the MODIS  
22 cloud fields. The current data selection does not select data south of 65 degrees in latitude, as experience with ACOS data showed  
23 that retrievals over ice failed routinely. We intend to retrieve the small number of cloud-free scenes over bare ground at these  
24 latitudes in the next version of the retrieval. Due to clouds, solar illumination and geometry, any given month has data that spans  
25 about 100 degrees in latitude, but the coverage band shifts north and south with the seasons.

#### 26 4.3.2 Signal to noise ratios

27 The OCO-2 instrument was designed to provide adequate continuum signal to noise (SNR) to achieve 0.3% precision for X<sub>CO2</sub>  
28 measurements. The SNR design requirements were 290, 270, and 190 at nominal radiance levels (5.8, 2.1, and 1.1 x 10<sup>19</sup> photons  
29 m<sup>-2</sup> sr<sup>-1</sup> μm<sup>-1</sup> s<sup>-1</sup>) in the A-band, weak and strong CO<sub>2</sub> band, respectively. The in-flight performance has met or exceeded all  
30 expectations, with SNR values as provided in the data product (radiance mean value in the continuum divided by the radiance noise  
31 value in the continuum) typically between 250 and 450 for the A-band, 400 to 800 for the WCO2 band, and 200 to 500 for the  
32 SCO2 band. Figure 6 illustrates just one month of SNR levels, as no large seasonal dependence is observed. There are spatial  
33 patterns, with high SNR values over the bright deserts and in cloudy regions. The lowest SNR values are over oceans, especially  
34 when observed at higher solar zenith angles, particularly for the A-band.

Formatted: Superscript

#### 35 4.3.3 χ<sup>2</sup> goodness of fit parameter

36

Deleted: \*

Formatted Table

... [1]

$$\chi_i^2 = \frac{\frac{1}{n} \sum (y - F(x))^2}{\frac{1}{n} \sum \epsilon^2} \quad (4.1)$$

Formatted: Font:Not Italic

Formatted: Font:Not Italic

Formatted: Centered

Deleted: (4-1)

Formatted: Font:Bold

Formatted: Font:Bold

Formatted: Font:Bold

The reduced  $\chi^2$  goodness of fit parameter is a convenient measure of the magnitude of the spectral residuals relative to the measurement error. The equation for per band ( $\chi_i^2$ ) is given in Equation **Error! Reference source not found.**, where where  $i$  is the band index (1..3),  $y$  is the measured radiance spectrum,  $\epsilon$  is the error on the measured radiance spectrum, and  $F(x)$  is the forward model with the state vector  $x$  (Crisp et al., 2014; O'Dell et al., 2012, 2016). The summation is over the  $n$  valid spectral points. As discussed in Crisp et al., 2014, the persistent spectral residuals caused by limitations in the spectroscopic input data and instrumental effects are removed by fitting to empirically derived spectral vectors. This approach systematically reduces  $\chi^2$  and also reduces the dependence of  $\chi^2$  on the signal to noise ratio.

For OCO-2, we have seen that there is little seasonal dependence, but there are clear spatial patterns, as illustrated in Figure 7. In the A-band, prominent features occur in the region of the South Atlantic Anomaly (SAA) (Crisp et al., 2016a). The effects of this region of a high density of high energy particles are seen as radiance spikes in the A-band measurements. We attempt to screen out the effects, but the fitting is still poor in this region. For the weak and strong CO<sub>2</sub> bands, the bright desert of the Sahara results in larger chi-square values, and mountainous regions impact the strong CO<sub>2</sub> fits.

#### 4.3.4 Warn levels

The data presented in this paper have data quality screening applied. For the OCO-2 dataset, we have developed warn levels (Mandrake et al., 2013 and Mandrake et al., in prep 2016). The concept behind the warn levels is that the data are ordered by quality as defined by a number of data variance metrics, allowing the user to make decisions concerning the trade off between data volume and data quality. This is a more flexible approach than the traditional good or bad quality assignment, and reflects the fact that data quality is a continuum, not a binary quantity, and should be indicated as such. The OCO-2 warn levels range from 0 to 19, with 0 indicating the highest quality and 19 considered the lowest quality. More details of the process used to develop warn levels are reported in Mandrake et al. 2013, 2016 (in prep) as well as the OCO-2 Lite file documentation [Mandrake et al., 2015]. Our recommendation is that users should not use data above a warn level of 15 for all land data, nor above 18 for water glint. This removes approximately 25% of the land data and 10% of the water glint data.

For the v7r data, outliers were screened with a set of additional flags, related to the cloud preprocessors, aerosol optical depths, surface characteristics, etc. The detailed flagging parameters and thresholds are provided in the Lite file user's guide. The warn level thresholds and outlier screening are combined in the 0/1 flag that is included in the Lite file, to be compatible with the European Greenhouse Gas Climate Change Initiative (GHG-CCI) data product specifications (Buchwitz et al., 2015). We have used this screening for the maps shown in this paper, but strongly encourage users to carefully evaluate the warn levels that are appropriate for their science analysis.

#### 4.3.5 Data density after quality screening

The data density after quality screening for a few select months is illustrated in Figure 8. The monthly total data density ranges from 1.3 million to 2.4 million soundings per month selected by the xco2\_quality\_flag in the Lite file for periods without decontamination cycles, influenced by the mixture of nadir and glint measurements, as well as clouds and season. For individual 2



1 degree by 2 degree regions, the number of soundings in a month range from a few to over a thousand. There is a roughly inverse  
2 relationship, so for example, on a monthly basis, about 100 of the 2 degree by 2 degree cells have 100 soundings, and 10 have 1000  
3 soundings. The preprocessors, as described in Taylor et al. (2016), limit the data that is put through L2 processing, and then  
4 processing failures and data screening further trim the dataset. Nevertheless, there is a large volume of high quality data available  
5 from OCO-2. The highest densities of data are over desert areas, although mid-latitude data density is high during some seasons.  
6 As reported in Taylor et al. (2016) the prescreening and resulting data density is consistent with MODIS cloud statistics.

7 The cloudy region of the inter-tropical convergence zone (ITCZ) has lower data density, as does northern South America. This  
8 region is impacted by clouds as well as the SAA, where cosmic ray events impact OCO-2 measurements. For the v7/v7r data, the  
9 preprocessors do not account for the SAA impacts, and thus a significant fraction of data are screened out. In the next version, the  
10 preprocessors will have SAA treatment integrated, and we expect that the data yield will increase in this region.

#### 11 4.3.6 Bias correction

12 The bias correction described in O'Dell et al. (2016) and the OCO-2 documentation (Mandrake et al., 2015) was applied to the  
13  $X_{CO_2}$  data shown in Figures 3, 4, and 5. The monthly mean bias corrections for 3 sample months are shown in Figure 9. The bias  
14 correction seeks to remove systematic footprint-to-footprint differences, mode-to-mode differences (for example systematic  
15 differences between land glint and land nadir measurements), and systematic differences that appear to be correlated to other  
16 retrieval variables. Two predictive variables are currently used in the bias correction for land retrievals, and three are used for ocean  
17 retrievals. In addition, the bias correction process puts the OCO-2 data on the same scale as the Total Carbon Column Observing  
18 Network (TCCON) ground-based measurements, which are tied to the WMO scale for carbon dioxide (Wunch et al., 2016, 2010,  
19 2011). The OCO-2 mission development included a validation plan which recognized the need for the TCCON network and a  
20 special data collection mode to gather adequate validation data. A detailed discussion of the ground-based data and the OCO-2 data  
21 that are collected in target mode at these locations can be found in Wunch et al., 2016. Details of the derivation of the bias correction  
22 and its relationship to other variables can be found in O'Dell et al. (2016). The monthly distribution of the bias correction values  
23 are well described by Gaussian distributions. Overall, for the water glint observations on monthly scales, the mean of the  
24 distribution is 0.0 to 0.4 ppm, with a standard deviation of about 0.55ppm. For land glint observations, the mean is larger, 0.9 to  
25 1.1 ppm, and the standard deviation is typically 1.2 ppm. The land nadir distribution has a similar standard deviation, about 1.2ppm,  
26 with a mean of 1.3 to 1.8 ppm. The patterns strongly follow latitudinal gradients, likely driven by viewing geometry with aerosol  
27 and cloud scattering becoming more important as the instrument views through longer paths of the atmosphere. The bias correction  
28 is described in more detail in O'Dell et al. (2016).

29

#### 30 4.3.7 Uncertainty on $X_{CO_2}$ product

31 The OCO-2 data products include an estimate of the uncertainty on the  $X_{CO_2}$  data. As discussed by Connor et al. (2008, 2016), this  
32 estimate is a lower bound, as it includes error related to the noise on the radiance measurement, the smoothing error, and  
33 interference error. Propagation of systematic errors in input terms for the forward model to the  $X_{CO_2}$  estimate is not considered in  
34 the error estimate reported in the v7/v7r L2 products. Figure 10 is a set of maps of the average  $X_{CO_2}$  uncertainty from the data  
35 product for a six-month period. This shows that the estimated uncertainty is generally smaller over water than the land surface and  
36 that the uncertainty is larger at the extreme latitudes, where interference errors grow. Worden et al. (2016) have made a careful  
37 assessment of the OCO-2 uncertainty estimates, by evaluating the standard deviation of the difference from the mean  $X_{CO_2}$  for  
38 collections of soundings within 100km in latitude. They compare this to the expected standard deviation due to noise. This research

1 showed that while linearly correlated, the  $X_{CO_2}$  calculated measurements error in the data product appears to underestimate the  
2 empirically-derived  $X_{CO_2}$  measurement error by a factor of approximately 2, with a larger underestimate for land data and a smaller  
3 underestimate for water glint measurements.

4 In the optimal estimation retrieval, algorithm input choices such as the *a priori* mean state vector ( $\mathbf{x}_a$ ) and *a priori* covariance ( $\mathbf{S}_a$ ),  
5 or constraint, can impact the variability in the retrieval error in  $X_{CO_2}$ . The *a posteriori* covariance matrix ( $\mathbf{S}$ ) is also an important  
6 output of the L2 retrieval process, as it is critical for the data assimilation process used to determine  $CO_2$  fluxes. The OCO-2 project  
7 is in the midst of an evaluation of this quantity and the accuracy of the algorithm's reported uncertainty as a measure of the error  
8 variability, through the use of large-scale simulations. By running simplified retrievals over large ensembles of input variables  
9 (priors, constraints, and other parameters), one can assess the characteristics of the retrieval bias and variance and evaluate what is  
10 reported in the data product (Hobbs et al., 2016). The choice of prior becomes particularly impactful for moderate to large aerosol  
11 optical depths (0.1 or more).

12 There are many other variables that are co-retrieved with the  $X_{CO_2}$ , including surface pressure, aerosol optical depth, surface albedo,  
13 water profile scaling factor, and an offset of the temperature profile. The aerosol optical depths are being compared against  
14 independent measurements, such as AERONET optical depths while an analysis of the retrieved water vapor profiles against  
15 SuomiNet and the Advanced Microwave Scanning Radiometer-2 (AMSR-2) is also being conducted (Nelson and O'Dell, 2016).  
16 As discussed in detail in O'Dell et al. (2016), many of these parameters will compensate for one another in the retrieval algorithm,  
17 so must be considered 'effective quantities' (e.g. 'effective albedo' and 'effective optical depth') as they are the values that  
18 minimize the fit in an optimal estimation scheme, but they are at times not directly related to the physical quantity (Kulawik et al.,  
19 2006, Eldering et al., 2008). The performance and relationships of these parameters are discussed at length in O'Dell et al., 2016.

#### 20 4.4 Solar induced fluorescence

21 Using GOSAT and GOME-2 spectra, Frankenberg et al. (2011, 2012, 2014, 2015; Joiner et al. 2011) demonstrated that using the  
22 observed Fraunhofer line fractional depths, solar-induced fluorescence of chlorophyll can be quantified. Frankenberg et al. (2014)  
23 performed a pre-flight assessment of the fluorescence measurement performance of OCO-2. This measurement approach is being  
24 applied to the OCO-2 data, motivated in part because neglect of this phenomenon results in errors in surface pressure and aerosol  
25 optical depth, which propagate into a small bias in the  $X_{CO_2}$  retrieval (Frankenberg et al., 2012).

26 The IDP preprocessor performs the SIF retrieval, along with single band retrievals of the water and  $CO_2$  columns that are used for  
27 cloud screening purposes. As described in Frankenberg et al. (2014) the SIF retrieval is impacted less strongly by clouds than the  
28  $X_{CO_2}$  retrieval, so useful data is collected over a much larger number of soundings. However, high single-measurement precision  
29 errors warrant aggregation in space and/or time for scientific use. The SIF product is derived at two wavelengths, 757nm and  
30 771nm, and it is recommended that the user examine both fields independently, as this first dataset (v7r) may have different errors  
31 in each product.

32 Figures 11 illustrates a year of SIF retrievals, where data has been averaged across seasons. These show expected features, such as  
33 the high SIF values in the regions of intense agriculture during early summer, and the low SIF in the Northern Hemisphere during  
34 its winter. The SIF signal in the tropics has some seasonality to it, but is always larger than  $0.5 \text{ W m}^{-2} \mu\text{m}^{-1} \text{ sr}^{-1}$ .

35 Campaigns are underway to compare OCO-2 measurements to data at flux towers and to underfly the OCO-2 measurements with  
36 an aircraft-mounted grating spectrometers. Details of these inter-comparisons are in Sun et al. (in prep, 2016). The objective of  
37 those studies is to quantify the relationship of OCO-2 derived SIF with independent measurements.

1  
2  
3  
4  
5  
6  
7  
8  
9  
10  
11  
12  
13  
14  
15  
16  
17  
18  
19  
20  
21  
22  
23  
24  
25  
26  
27  
28  
29  
30  
31  
32  
33  
34

5 Gradients and trends in observed X<sub>CO2</sub>

5.1 Growth rate of X<sub>CO2</sub>

The dense, global dataset from OCO-2 can be used to assess the annual growth rate of X<sub>CO2</sub>. Figure 12 shows the annual zonal growth rates derived from OCO-2 for 5 different 12 month periods. The growth rate as determined from the NOAA ESRL station at Mauna Loa is shown for comparison. The growth rates are generally between 2.5 and 3 ppm per 12 months from 2014 to 2015, which includes the largest growth rate ever recorded at the Mauna Loa Observatory. More detailed analysis of the growth rate such as that presented for GOSAT data in Kulawik et al. (2016) and Lingqvist et al. (2015) are required to quantitatively assess the growth rate from OCO-2, but this first look shows the OCO-2 has a reasonable range of values. The figure also illustrates the longitudinal standard deviation of the OCO-2 data for each latitude band. Note that the Mauna Loa Observatory is a background site, whereas the OCO-2 measurements span both background sites and populated regions. This variability may drive the standard deviation, although OCO-2 glint retrievals over water tend to have lower variability than OCO-2 land retrievals, which could also explain the standard deviation. The relative sampling of regions of emissions and uptake differs in time with OCO-2, which will result in a different 12-month growth rate than that derived from the NOAA ESRL station.

Deleted: ,  
Deleted: and t  
Deleted: s

5.2 Seasonal cycle of X<sub>CO2</sub> near Hawaii

A time series of weekly average X<sub>CO2</sub> from OCO-2 for a region around Hawaii is shown in Figure 13. For this analysis, we have selected glint data over water only applied the quality flag, and gathered data from a region that span from 175° W to 130° W in longitude, and from 15° N to 25° N in latitude. The time series clearly shows weekly and monthly changes as observed by OCO-2. The standard deviation of the weekly-averaged data range from 0.5 to 0.8 ppm, smaller than the seasonal changes and at times the monthly changes. There are 2000 to 20,000 measurements averaged per week for the OCO-2 data. The timeseries shows little growth between January and February 2015, and in early 2016. The minimum of the year occurs in August and September, similar to the timing of the minimum in surface measurements. Now that OCO-2 has a full two year record, seasonal cycle analysis such as that in Lingqvist et al. (2015) can be conducted with OCO-2 data. Wunch et al. (2016) provide timeseries at all of the TCCON locations, with all OCO-2 measurement mode data (nadir, glint, target).

Deleted: water

Deleted: The ground-based measurements collected at Mauna Loa Observatory are overplotted, although OCO-2 data are not directly comparable to the NOAA ESRL and other ground-based measurements, because OCO-2 senses the total column of X<sub>CO2</sub> rather than surface concentrations. If the vertical gradient of CO<sub>2</sub> is small, we expect similar values for the two measurements, whereas the surface measurements will be larger than the OCO-2 X<sub>CO2</sub> measurements if there are CO<sub>2</sub> enhancements in the lower atmosphere.

Deleted: Both datasets  
Deleted: The surface measurements and X<sub>CO2</sub> are most similar

Deleted: and the X<sub>CO2</sub> further north is nearly the same as Mauna Loa surface CO<sub>2</sub> concentrations in August through October. The differences between the total column and surface measurements are greatest in the early spring, as the build-up of CO<sub>2</sub> in the Northern Hemisphere is present in the near surface layers, but has not propagated vertically to the X<sub>CO2</sub> signal. The standard deviation of the weekly-averaged data range from 0.5 to 0.8 ppm, with 2000 to 20,000 measurements averaged per week for the OCO-2 data

Deleted: .  
Formatted: English (US)  
Deleted: <#>Latitudinal gradient ... [2]

5.3 Assessment of overall data quality

The OCO-2 mission has been successful in collecting over a million measurements of radiance spectra in the A-band, weak and strong CO<sub>2</sub> bands each day. After screening for clouds, and applying post retrieval quality flags, OCO-2 typically delivers 100,000 global measurements of CO<sub>2</sub> per day. Detailed comparisons have been made against the Total Column Carbon Observing Network, and the OCO-2 measurements agree within 1 ppm in most cases (see Wunch et al., 2016).  
There are regions of the world that have consistent high data yields, such as desert regions and the oceans to the north and south of the cloudy ITCZ. Regions of persistently low data yield include the region over South America that is impacted by the South

Atlantic Anomaly, ocean regions of the ITCZ, and regions where the solar zenith angles are large (especially northern latitudes in NH winter, and southern latitudes during SH winter).

The dataset is consistent in time, showing stability in diagnostic parameters such as the measurement SNR and retrieval  $\chi^2$  as well as the overall data density. Not surprisingly, there are some data features that are inconsistent with the validation dataset, and different from model predictions. The largest feature is a high bias in  $X_{CO_2}$  over water for southern latitudes during the Southern Hemisphere winter. This issue is apparent in the TCCON comparisons for Wollongong shown in Wunch et al. (2016), and in the comparison to models presented in O'Dell et al. (2016). This bias has been extensively examined by the OCO-2 teams, who have considered viewing geometry, polarization effects, interferences such as aerosols, surface models, and instrument performance. The analysis has not yet yielded insights into the root cause, although in early testing, there are indications that the lack of stratospheric aerosols in the current version of the retrieval algorithm can significantly increase bias.

The v7/v7r data version discussed here is the current operational data product. In the future, a v8/v8r data product will be produced that addresses calibration issues as described in Crisp et al. (2016ab), as well as retrieval algorithm improvements described in O'Dell et al. (2016) such as the land surface treatment and others that are not yet fully tested. Future changes to the retrieval algorithm will focus on improving the parameterization of the patterns of bias for correction, if not direct reduction of the bias.

15

## 16 6 Conclusions

The OCO-2 mission has been successful in collecting a dense, global set of high-spectral resolution measurement that are used to estimate the column-averaged atmospheric  $CO_2$  dry air mole fraction,  $X_{CO_2}$ . The first 18 months of the missions have provided 1.3 to 2.4 million  $X_{CO_2}$  measurements per month after screening for data quality. As described in Wunch et al. (2016), the data have median difference of less than 0.5 ppm with the primary ground-based validation network, and RMS differences typically below 1.5 ppm. This statistic from Wunch et al. (2016) is for data with a warn level below 11 and an “outcome flag” of zero, which are slightly less strict selection criteria than the 0/1 quality flag. Large-scale features, such as the drawdown of  $CO_2$  in the Northern Hemisphere spring and the increase of  $CO_2$  over Northern Hemisphere winter are obvious in the data. By meeting the mission goals for accuracy, resolution, and coverage, the OCO-2 mission has provided a dataset that can now be used to assess regional-scale sources (emitters) and sinks (absorbers) around the globe.

26

## 27 7 Data Availability

All of the OCO-2 data products are publically available through the NASA Goddard Earth Science Data and Information Services Center (GES DISC) for distribution and archiving (<http://disc.sci.gsfc.nasa.gov/OCO-2>).

30

## 31 Acknowledgements

Part of this work was conducted at the Jet Propulsion Laboratory, California Institute of Technology under contract with the National Aeronautics and Space Administration (NASA) for the Orbiting Carbon Observatory-2 Project. Work at Colorado State University and The Geology and Planetary Sciences Department at the California Institute of Technology were supported by subcontracts from the OCO-2 Project. The NOAA ESRL ground-based weekly averaged measurements from Mauna Loa Observatory were obtained from [www.esrl.noaa.gov/gmd/ccgg/trends/](http://www.esrl.noaa.gov/gmd/ccgg/trends/).

37

## 1   **References**

- 2
- 3   Arora, V.K., Boer, G.J., Friedlingstein, P., Eby, M., Jones, C.D., Christian, J.R., Bonan, G., Bopp, L., Brovkin, V., Cadule, P. and
- 4   Hajima, T.: Carbon–concentration and carbon–climate feedbacks in CMIP5 Earth system models, *Journal of Climate*, 26, 5289–
- 5   5314, 2013.
- 6   Basilio, R. R., Pollock, H., and Hunyadi-Lay, S.L.: OCO-2 (Orbiting Carbon Observatory-2) mission operations planning and
- 7   initial operations experiences. *SPIE Remote Sensing*, International Society for Optics and Photonics, 2014.
- 8   Bösch, H., Toon, G., Sen, B., Washenfelder, R., Wennberg, P., Buchwitz, M., de Beek, R., Burrows, J., Crisp, D., Christi, M.,
- 9   Connor, B. J., Natraj, V., and Yung, Y. L.: Space-based near-infrared CO<sub>2</sub> measurements: Testing the Orbiting Carbon Observatory
- 10   retrieval algorithm and validation concept using SCIAMACHY observations over Park Falls, Wisconsin, *J. Geophys. Res.*, 111,
- 11   0148–0227, doi: 10.1029/2006JD007080, 2006.
- 12   Bösch, H., Baker, D., Connor, B., Crisp, D., and Miller, C.: Global characterization of CO<sub>2</sub> column retrievals from shortwave-
- 13   infrared satellite observations of the Orbiting Carbon Observatory-2 Mission, *Remote Sensing*, 3, 270–304,
- 14   doi:10.3390/rs3020270, 2011.
- 15   Buchwitz, M., de Beek, R., Noel, S., Burrows, J. P., Bovensmann, H., Schneising, O., Khlystova, I., Bruns, M., Bremer, H.,
- 16   Bergamaschi, P., Körner, S., and Heimann, M.: Atmospheric carbon gases retrieved from SCIAMACHY by WFM-DOAS: version
- 17   0.5 CO and CH<sub>4</sub> and impact of calibration improvements on CO<sub>2</sub> retrieval, *Atmos. Chem. Phys.*, 6, 2727–2751, doi:10.5194/acp-
- 18   6-2727-2006, 2006.
- 19   [Buchwitz, M., Reuter, M., Schneising, O., Boesch, H., Guerlet, S., Dils, B., Aben, I., Armante, R., Bergamaschi, P., Blumenstock,](#)
- 20   [T. and Bovensmann, H.: The Greenhouse Gas Climate Change Initiative \(GHG-CCI\): Comparison and quality assessment of near-](#)
- 21   [surface-sensitive satellite-derived CO<sub>2</sub> and CH<sub>4</sub> global data sets, \*Remote Sensing of Environment\*, 162, pp.344-362, 2015.](#)
- 22   Burrows J. P., Hölzle, E., Goede, A. P. H., Visser, H. and Fricke, W.: SCIAMACHY - Scanning Imaging Absorption Spectrometer
- 23   for Atmospheric Chartography. *Acta Astronautica*, 35, 445-451, 1995.
- 24   Chevallier, F., Palmer, P.I., Feng, L., Bösch, H., O'Dell, C.W. and Bousquet, P.: Toward robust and consistent regional CO<sub>2</sub> flux
- 25   estimates from in situ and spaceborne measurements of atmospheric CO<sub>2</sub>, *Geophys. Res. Lett.*, 41, 1065–1070, doi:10.1002/
- 26   2013GL058772, 2014.
- 27   Connor, B. J., Bösch, H., Toon, G., Sen, B., Miller, C., and Crisp, D.: Orbiting Carbon Observatory: Inverse method and prospective
- 28   error analysis, *J. Geophys. Res.*, 113, D05305, doi:10.1029/2006JD008336, 2008.
- 29   Connor, B., Bösch, H., McDuffie, J., Taylor, T., Fu, D., Frankenberg, C., O'Dell, C., H. Payne, V.H., Gunson, M.R., Pollock, H.,
- 30   Hobbs, J., Oyafuso, F., and Jiang, Y.: Quantification of uncertainties in OCO-2 measurements of X<sub>CO2</sub>: simulations and linear error
- 31   analysis, *Atmospheric Measurement Techniques*, in review, 2016
- 32   Crisp, D., Atlas, R.M., Breon, F.-B., Brown, L.R., Burrows, J.P., Ciais, P., Connor, B.J., Doney, S.C., Fung, I.Y., Jacob, D.J.,
- 33   Miller, C.E., O'Brien, D., Pawson, S., Randerson, J.T., Rayner, P., Salawitch, R.J., Sander, S.P., Sen, B., Stephens, G.L., Tans,
- 34   P.P., Toon, G.C., Wennberg, P.O., Wofsy, S.C., Yung, Y.L., Kuang, Z., Chudasama, B., Sprague, G., Weiss, B., Pollock, R.,
- 35   Kenyon, D., Schroll, S.: The Orbiting Carbon Observatory (OCO) mission, *Advances in Space Research*, 34, 700–709, 2004.

**Deleted:** Buchwitz, Michael, et al.: The Greenhouse Gas Climate Change Initiative (GHG-CCI): Comparison and quality assessment of near-surface-sensitive satellite-derived CO<sub>2</sub> and CH<sub>4</sub> global data sets, *Remote Sensing of Environment*, 162, 344-362, 2015.

**Formatted:** Font:Not Italic

**Formatted:** Font:Not Italic

**Formatted:** English (US)

1 Crisp, D., Miller, C.E., DeCola, P.L.: NASA Orbiting Carbon Observatory: measuring the column averaged carbon dioxide mole  
2 fraction from space, *J. Appl. Remote Sens.*, 2, 023508; doi:10.1117/1.2898457, 2008.

3 Crisp, D., Fisher, B. M., O'Dell, C., Frankenberg, C., Basilio, R., Bösch, H., Brown, L. R., Castano, R., Connor, B., Deutscher,  
4 N.M., Eldering, A., Griffith, D., Gunson, M., Kuze, A., Mandrake, L., McDuffie, J., Messerschmidt, J., Miller, C. E., Morino, I.,  
5 Natraj, V., Notholt, J., O'Brien, D.M., Oyafuso, F., Polonsky, I., Robinson, J., Salawitch, R., Sherlock, V., Smyth, M., Suto, H.,  
6 Taylor, T. E., Thompson, D. R., Wennberg, P. O., Wunch, D., and Yung Y. L.: The ACOS CO<sub>2</sub> retrieval algorithm--Part II: Global  
7 XCO<sub>2</sub> data characterization, *Atmos. Meas. Tech.*, 5, 687–707, 2012.

8 Crisp et al., Orbiting Carbon Observatory (OCO) – 2 Level 2 Full Physics Algorithm Theoretical Basis Document, Tech. Rep. D-  
9 55207, NASA Jet Propulsion Laboratory, California Institute of Technology, Version 2.0, Rev 2,  
10 [http://disc.sci.gsfc.nasa.gov/OCO-2/documentation/oco-2-v5/OCO-2\\_ATBD\\_140530\\_with\\_ASF.pdf](http://disc.sci.gsfc.nasa.gov/OCO-2/documentation/oco-2-v5/OCO-2_ATBD_140530_with_ASF.pdf) (last access June, 2016),  
11 2014.

12 [Crisp, D., Pollock, H. R., Rosenberg, R., Chapsky, L., Lee, R. A. M., Oyafuso, F. A., Frankenberg, C., O'Dell, C. W., Bruegge, C.](#)  
13 [J., Doran, G. B., Eldering, A., Fisher, B. M., Fu, D., Gunson, M. R., Mandrake, L., Osterman, G. B., Schwandner, F. M., Sun, K.,](#)  
14 [Taylor, T. E., Wennberg, P. O., and Wunch, D.: The On-Orbit Performance of the Orbiting Carbon Observatory-2 \(OCO-2\)](#)  
15 [Instrument and its Radiometrically Calibrated Products, \*Atmos. Meas. Tech. Discuss.\*, doi:10.5194/amt-2016-281, in review, 2016.](#)

16 Crisp et al., Evolution of the Orbiting Carbon Observatory-2 (OCO-2) observing strategy, in preparation, 2016b.

17 Dlugokencky, E. and Tans, P.: Trends in atmospheric carbon dioxide, National Oceanic & Atmospheric Administration, Earth  
18 System Research Laboratory (NOAA/ESRL), available at: <http://www.esrl.noaa.gov/gmd/ccgg/trends>, last access: 7 October 2015.

19 Eldering, A., Kulawik, S.S., Worden, J., Bowman, K., and Osterman, G.: Implementation of cloud retrievals for TES atmospheric  
20 retrievals: 2. Characterization of cloud top pressure and effective optical depth retrievals, *J. Geophys. Res.*, 113, D16S37,  
21 doi:10.1029/2007JD008858, 2008.

22 Eldering, A., Pollock, R., Lee, R., Rosenberg, R., Oyafuso, F., Crisp, D., Granat, R.: Orbiting Carbon Observatory (OCO) – 2 Level  
23 1B Theoretical Basis Document, Tech. Rep. D-55206, NASA Jet Propulsion Laboratory, California Institute of Technology,  
24 Version 1.2, Rev 1, [http://disc.sci.gsfc.nasa.gov/OCO-2/documentation/oco-2-v7/OCO2\\_L1B\\_ATBD.V7.pdf](http://disc.sci.gsfc.nasa.gov/OCO-2/documentation/oco-2-v7/OCO2_L1B_ATBD.V7.pdf), (last access June  
25 2016), 2015.

26 Feng, L., Palmer, P. I., Parker, R. J., Deutscher, N. M., Feist, D. G., Kivi, R., Morino, I., and Sussmann, R.: Estimates of European  
27 uptake of CO<sub>2</sub> inferred from GOSAT XCO<sub>2</sub> retrievals: sensitivity to measurement bias inside and outside Europe, *Atmos. Chem.*  
28 *Phys.*, 16(3), 1289–1302, doi:10.5194/acp-16-1289-2016, 2016.

29 Frankenberg, C.: Solar Induced Chlorophyll Fluorescence OCO-2 lite files (B7000) user guide, Technical Report, NASA Jet  
30 Propulsion Laboratory, California Institute of Technology, [http://disc.sci.gsfc.nasa.gov/OCO-2/documentation/oco-2-v7/OCO2\\_SIF\\_B7000\\_Product\\_Description\\_090215.pdf](http://disc.sci.gsfc.nasa.gov/OCO-2/documentation/oco-2-v7/OCO2_SIF_B7000_Product_Description_090215.pdf), (last access July 2016), 2015.

32 Frankenberg, C., Butz, A., and Toon, G. C.: Disentangling chlorophyll fluorescence from atmospheric scattering effects in O<sub>2</sub> A-  
33 band spectra of reflected sun-light, *Geophysical Research Letters*, 38(3), 2011.

34 Frankenberg, C., O'Dell, C., Guanter, L., & McDuffie, J.: Remote sensing of near-infrared chlorophyll fluorescence from space in  
35 scattering atmospheres: implications for its retrieval and interferences with atmospheric CO<sub>2</sub> retrievals, *Atmospheric Measurement*  
36 *Techniques*, 5(8), 2081–2094, 2012.

Deleted: Crisp et al. ; The on-orbit performance of the Orbiting Carbon Observatory-2 (OCO-2) instrument, in preparation, 2016a. .

1 Frankenberg, C., O'Dell, C., Berry, J., Guanter, L., Joiner, J., Köhler, P., Pollock, R., and Taylor, T. E.: Prospects for chlorophyll  
2 fluorescence remote sensing from the Orbiting Carbon Observatory-2, *Remote Sensing of Environment*, 147, 1-12, 2014.

3 Friedlingstein, P., Cox, P., Betts, R., Bopp, L., Von Bloh, W., Brovkin, V., Cadule, P., Doney, S., Eby, M., Fung, I. and Bala, G.:  
4 Climate-carbon cycle feedback analysis: Results from the C4MIP model intercomparison, *Journal of Climate*, 19(14), 3337-3353,  
5 2006.

6 Guerlet, S., Basu, S., Butz, A., Krol, M., Hahne, P., Houweling, S., Hasekamp, O. P., and Aben, I.: Reduced carbon uptake during  
7 the 2010 Northern Hemisphere summer from GOSAT, *Geophys. Res. Lett.*, 40, 2378–2383, doi:10.1002/grl.50402, 2013.

8 Hobbs, J., Braverman, A., Cressie, N., Granat, R., and Gunson, M.: Uncertainty quantification for remote sensing retrievals. Under  
9 review, 2016.

10 Joiner, J., Yoshida, Y., Vasilkov, A.P. and Middleton, E.M.: First observations of global and seasonal terrestrial chlorophyll  
11 fluorescence from space, *Biogeosciences* 8.3, 637-651, 2011.

12 Kulawik, S. S., Worden, J., Eldering, A., Bowman, K., Gunson, M., Osterman, G. B., Zhang, L., Clough, S., Shephard, M. W.,  
13 and Beer, R.: Implementation of cloud retrievals for Tropospheric Emission Spectrometer (TES) atmospheric retrievals: part 1.  
14 Description and characterization of errors on trace gas retrievals, *J. Geophys. Res.*, 111, D24204, doi:10.1029/2005JD006733.,  
15 2006.

16 Kulawik, S., Wunch, D., O'Dell, C., Frankenberg, C., Reuter, M., Oda, T., Chevallier, F., Sherlock, V., Buchwitz, M., Osterman,  
17 G., Miller, C. E., Wennberg, P. O., Griffith, D., Morino, I., Dubey, M. K., Deutscher, N. M., Notholt, J., Hase, F., Warneke, T.,  
18 Sussmann, R., Robinson, J., Strong, K., Schneider, M., De Mazière, M., Shiomi, K., Feist, D. G., Iraci, L. T., and Wolf, J.:  
19 Consistent evaluation of ACOS-GOSAT, BESD-SCIAMACHY, CarbonTracker, and MACC through comparisons to TCCON,  
20 Atmos. Meas. Tech., 9, 683-709, doi:10.5194/amt-9-683-2016, 2016.

21 Le Quéré, C., Moriarty, R., Andrew, R. M., Canadell, J. G., Sitch, S., Korsbakken, J. I., Friedlingstein, P., Peters, G. P., Andres,  
22 R. J., Boden, T. A., Houghton, R. A., House, J. I., Keeling, R. F., Tans, P., Armeth, A., Bakker, D. C. E., Barbero, L., Bopp, L.,  
23 Chang, J., Chevallier, F., Chini, L. P., Ciais, P., Fader, M., Feely, R. A., Gkritzalis, T., Harris, I., Hauck, J., Ilyina, T., Jain, A. K.,  
24 Kato, E., Kitidis, V., Klein Goldewijk, K., Koven, C., Landschützer, P., Lauvset, S. K., Lefèvre, N., Lenton, A., Lima, I. D., Metzl,  
25 N., Millero, F., Munro, D. R., Murata, A., Nabel, J. E. M. S., Nakaoka, S., Nojiri, Y., O'Brien, K., Olsen, A., Ono, T., Pérez, F. F.,  
26 Pfeil, B., Pierrot, D., Poulter, B., Rehder, G., Rödenbeck, C., Saito, S., Schuster, U., Schwinger, J., Séférian, R., Steinhoff, T.,  
27 Stocker, B. D., Sutton, A. J., Takahashi, T., Tilbrook, B., van der Laan-Luijkx, I. T., van der Werf, G. R., van Heuven, S.,  
28 Vandemark, D., Viovy, N., Wiltshire, A., Zaehle, S., and Zeng, N.: Global carbon budget 2015, *Earth Syst. Sci. Data*, 7, 349-396,  
29 doi:10.5194/essd-7-349-2015, 2015.

30 Lee, R.A.M., O'Dell, C.W., Wunch, D., Roehl, C., Osterman, G.B., Blavier, J.F., Rosenberg, R., Chapsky, L., Frankenberg, C.,  
31 Hunyadi-Lay, S.L. and Fisher, B.M.: Preflight spectral calibration of the Orbiting Carbon Observatory 2, *IEEE T. Geosci. Remote*,  
32 submitted, 2016

33 Lindqvist, H., O'Dell, C. W., Basu, S., Boesch, H., Chevallier, F., Deutscher, N., Feng, L., Fisher, B., Hase, F., Inoue, M., Kivi,  
34 R., Morino, I., Palmer, P. I., Parker, R., Schneider, M., Sussmann, R., and Yoshida, Y.: Does GOSAT capture the true seasonal  
35 cycle of carbon dioxide?, *Atmos. Chem. Phys.*, 15, 13023-13040, doi:10.5194/acp-15-13023-2015, 2015.

36 Mandrake, L., Frankenberg, C., O'Dell, C. W., Osterman, G., Wennberg, P., and Wunch, D.: Semi-autonomous sounding selection  
37 for OCO-2, *Atmospheric Measurement Techniques Discussions*, 6(3), 5881-5922, 2013.

Deleted: ... &

Deleted: et al

Formatted: English (US)

Formatted: English (US)

1 Mandrake, L., O'Dell, C., Wunch, D., Wennberg, P.O., Fisher, B., Osterman, G.B., Eldering, A.: Lite Files, Warn Levels, and Bias  
2 Correction Determination, NASA Jet Propulsion Laboratory, California Institute of Technology, Version 1,  
3 [http://disc.sci.gsfc.nasa.gov/OCO-2/documentation/oco-2-v7/OCO2\\_XCO2\\_Lite\\_Files\\_and\\_Bias\\_Correction\\_0915\\_sm.pdf](http://disc.sci.gsfc.nasa.gov/OCO-2/documentation/oco-2-v7/OCO2_XCO2_Lite_Files_and_Bias_Correction_0915_sm.pdf) (last  
4 access July 2016), 2015.

5 Mandrake et al.; OCO-2's quality estimation and data filtering product: A complete description of the DOGO warn levels from  
6 construction to function, in preparation, 2016

7 Miller, C.E., Crisp, D., DeCola, P.L., Olsen, S.C., Randerson, J.T., Michalak, A.M., Alkhaled, A., Rayner, P., Jacob, D.J.,  
8 Suntharalingam, P. and Jones, D.B.A.: Precision requirements for space-based X<sub>CO2</sub> data, Journal of Geophysical Research:  
9 Atmospheres, 112(D10), 2007.

10 Nakajima, M., Kuze, A., Kawakami, S., Shiomi, K., and Suto, H.: Monitoring of the greenhouse gases from space by GOSAT.,  
11 International Archives of the Photogrammetry, Remote Sensing and Spatial Information Science, XXXVIII, Part 8, JAXA Special  
12 Session-5, 2010.

13 Nelson, R. R., Crisp, D., Ott, L.E., and O'Dell, C.W.: High-accuracy measurements of total column water vapor from the Orbiting  
14 Carbon Observatory-2, Geophysical Research Letters, 2016.

15 O'Dell, C. W., Connor, B., Bösch, H., O'Brien, D., Frankenberg, C., Castano, R., Christi, M., Crisp, D., Eldering, A., Fisher, B.,  
16 Gunson, M., McDuffie, J., Miller, C. E., Natraj, V., Oyafuso, F., Polonsky, I., Smyth, M., Taylor, T., Toon, G. C., Wennberg, P. O.,  
17 and Wunch, D.: The ACOS CO<sub>2</sub> retrieval algorithm – Part 1: Description and validation against synthetic observations, Atmos.  
18 Meas. Tech., 5, 99-121, 2012.

19 O'Dell et al.; The OCO-2 v7 X<sub>CO2</sub> retrieval algorithm: description and performance evaluation, in preparation, 2016.

20 Osterman, G.B., Eldering, A., Avis, C., O'Dell, C.W., Martinez, E., Crisp, D., Frankenberg, C., Fisher, B.: ACOS Level 2 Standard  
21 Product Data User's Guide, v3.5, Revision D, [http://disc.sci.gsfc.nasa.gov/OCO-2/documentation/gosat-acos/gosat-](http://disc.sci.gsfc.nasa.gov/OCO-2/documentation/gosat-acos/gosat-acosdoc/ACOS_v3.5_DataUsersGuide.pdf)  
22 [acosdoc/ACOS\\_v3.5\\_DataUsersGuide.pdf](http://disc.sci.gsfc.nasa.gov/OCO-2/documentation/gosat-acos/gosat-acosdoc/ACOS_v3.5_DataUsersGuide.pdf), (last access July 2016), 2016.

23 Rayner, P. J., and O'Brien, D. M.: The utility of remotely sensed CO<sub>2</sub> concentration data in surface source inversions, Geophysical  
24 Research Letters, 28(1), 175-178, 2001.

25 Rosenberg, R., Maxwell, S., Johnson, B.C., Chapsky, L., Lee, R.A.M., Pollock, H.R.: Preflight radiometric calibration of Orbiting  
26 Carbon Observatory 2, IEEE Transaction on Geoscience and Remote Sensing (TGRS), in review, 2016.

27 Reuter, M., Buchwitz, M., Hilker, M., Heymann, J., Schneising, O., Pillai, D., Bovensmann, H., Burrows, J. P., Bösch, H., Parker,  
28 R., Butz, A., Hasekamp, O., O'Dell, C. W., Yoshida, Y., Gerbig, C., Nehrkorn, T., Deutscher, N. M., Warneke, T., Notholt, J.,  
29 Hase, F., Kivi, R., Sussmann, R., Machida, T., Matsueda, H., and Sawa, Y.: Satellite-inferred European carbon sink larger than  
30 expected, Atmos. Chem. Phys., 14, 13739-13753, doi:10.5194/acp-14-13739-2014, 2014.

31 Schimel, D., Stephens, B.B., and Fisher, J.B.: Effect of increasing CO<sub>2</sub> on the terrestrial carbon cycle, PNAS, 112, 436-441, doi:  
32 10.1073/pnas.1407302112, 2015.

33 Schneising, O., Reuter, M., Buchwitz, M., Heymann, J., Bovensmann, H., and Burrows, J. P.: Terrestrial carbon sink observed  
34 from space: variation of growth rates and seasonal cycle amplitudes in response to interannual surface temperature variability,  
35 Atmospheric Chemistry and Physics, 14(1), 133-141, doi:10.5194/acp-14-133-2014, 2014.

Formatted: Font:Not Italic

Deleted: Nelson, R., and O'Dell, C.W.: Total column water vapor from OCO-2, in preparation, 2016. .

Deleted: i

Deleted: &



1 Sun, Y., et al., Solar-induced chlorophyll fluorescence from the Orbiting Carbon Observatory-2 (OCO-2): The spatial-temporal  
2 patterns and relationships with gross primary productivity (in prep), 2016.

3 Takahashi, T., Sutherland, S.C., Wanninkhof, R., Sweeney, C., Feely, R.A., Chipman, D.W., Hales, B., Friederich, G., Chavez, F.,  
4 Sabine, C. and Watson, A.: Climatological mean and decadal change in surface ocean pCO<sub>2</sub>, and net sea-air CO<sub>2</sub> flux over the  
5 global oceans. Deep Sea Research Part II: Topical Studies in Oceanography, 56(8), 554-577, 2009.

6 Taylor, T.E., O'Dell, C.W., Partain, P.T., Cronk, H.Q., Nelson, R.R., Rosenthal, E.J., Chang, A.Y., Osterman, G.B., Pollock, R.H.  
7 and Gunson, M.R.: Orbiting Carbon Observatory-2 (OCO-2) cloud screening algorithms: validation against collocated MODIS  
8 and CALIOP data, Atmospheric Measurement Techniques, 9(3), 973, 2016.

9 Van der Werf, G.R., Randerson, J.T., Giglio, L., Collatz, G.J., Mu, M., Kasibhatla, P.S., Morton, D.C., DeFries, R.S., Jin, Y.V.  
10 and van Leeuwen, T.T.: Global fire emissions and the contribution of deforestation, savanna, forest, agricultural, and peat fires  
11 (1997–2009). Atmospheric Chemistry and Physics, 10(23), pp.11707-11735, 2010.

12 Worden, J., Doran, G., Kulawik, S.S., Eldering, A., Crisp, D., Frankenberg, C., O'Dell, C., and Bowman, K.: Evaluation,  
13 validation, and attribution of OCO-2 X<sub>CO2</sub> uncertainties, in review, 2016.

14 Wunch, D., Toon, G.C., Wennberg, P.O., Wofsy, S.C., Stephens, B.B., Fischer, M.L., Uchino, O., Abshire, J.B., Bernath, P., Biraud,  
15 S.C. and Blavier, J.F.: Calibration of the Total Carbon Column Observing Network using aircraft profile data, Atmospheric  
16 Measurement Techniques, 3(5), 1351-1362, 2010.

17 Wunch, D., Wennberg, P.O., Toon, G.C., Connor, B.J., Fisher, B., Osterman, G.B., Frankenberg, C., Mandrake, L., O'Dell, C.,  
18 Ahonen, P. and Biraud, S.C.: A method for evaluating bias in global measurements of CO<sub>2</sub> total columns from space, Atmospheric  
19 Chemistry and Physics, 11(23), 12317-12337, 2011.

20 Wunch, D., Wennberg, P.O., Messerschmidt, J., Parazoo, N.C., Toon, G.C., Deutscher, N.M., Keppel-Aleks, G., Roehl, C.M.,  
21 Randerson, J.T., Warneke, T. and Notholt, J.: The covariation of Northern Hemisphere summertime CO<sub>2</sub> with surface temperature  
22 in boreal regions. Atmospheric Chemistry and Physics, 13(18), 9447-9459, 2013.

23 Wunch, D., Wennberg, P. O., Osterman, G., Fisher, B., Naylor, B., Roehl, C. M., O'Dell, C., Mandrake, L., Viatte, C., Griffith,  
24 D. W., Deutscher, N. M., Velazco, V. A., Notholt, J., Warneke, T., Petri, C., De Maziere, M., Sha, M. K., Sussmann, R.,  
25 Rettinger, M., Pollard, D., Robinson, J., Morino, I., Uchino, O., Hase, F., Blumenstock, T., Kiel, M., Feist, D. G., Arnold, S. G.,  
26 Strong, K., Mendonca, J., Kivi, R., Heikkinen, P., Iraci, L., Podolske, J., Hillyard, P. W., Kawakami, S., Dubey, M. K., Parker,  
27 H. A., Sepulveda, E., Rodriguez, O. E. G., Te, Y., Jeseck, P., Gunson, M. R., Crisp, D., and Eldering, A.: Comparisons of the  
28 Orbiting Carbon Observatory-2 (OCO-2) XCO<sub>2</sub> measurements with TCCON, Atmos. Meas. Tech. Discuss., doi:10.5194/amt-  
29 2016-227, in review, 2016.

Formatted: Font:Not Italic

Formatted: Font:Not Italic

Formatted: English (US)

Deleted:

Deleted: Toon, G. C., Wennberg, P. O., Wofsy, S. C.,  
Stephens, B. B., Fischer, M. L., ... & Blavier, J. F

Formatted: English (US)

Deleted: Wennberg, P. O., Toon, G. C., Connor, B. J.,  
Fisher, B., Osterman, G. B., ... & Biraud, S. C.:

Formatted: English (US)

Formatted: Font:(Default) Times New Roman, 12 pt, Not  
Bold

Deleted: Wunch et al., Comparisons of the Orbiting  
Carbon Observatory-2 (OCO-2) XCO<sub>2</sub> measurements  
with TCCON, submitted to Atmospheric Measurement  
Techniques, 2016. .

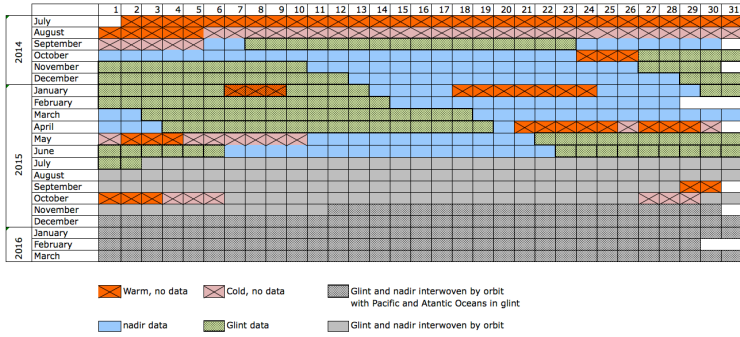

Figure 1. OCO-2 Data calendar with observation modes and data outages.

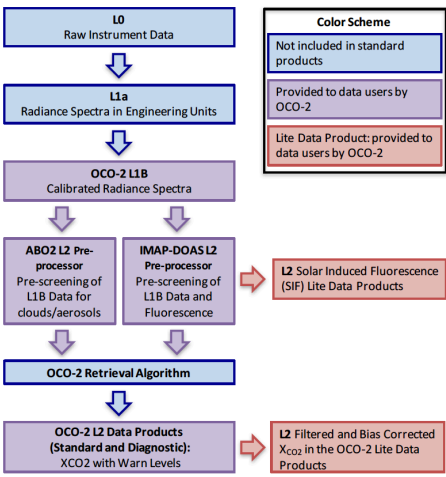

Figure 2. OCO-2 Data processing flow.

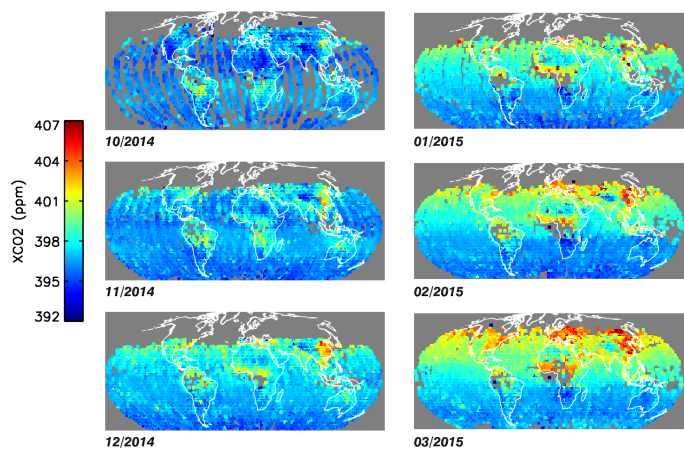

Figure 3. Maps of total column dry air ratio of  $\text{CO}_2$  ( $X_{\text{CO}_2}$ ) from OCO-2 from October 2014 through March 2015. Data has been bias corrected and screened using the data quality flag in the Lite file, and averaged in 2 degree by 2 degree bins.

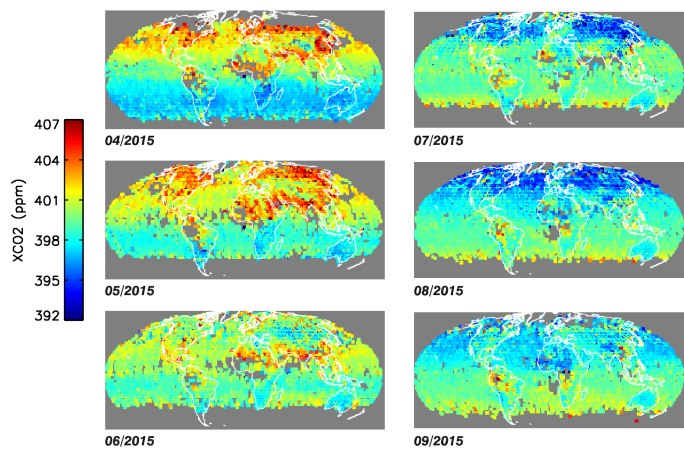

Figure 4. Maps of  $X_{\text{CO}_2}$  from OCO-2 from April 2015 through September 2015, bias corrected and selected with data quality flag and averaged on 2 degree by 2 degree grid.

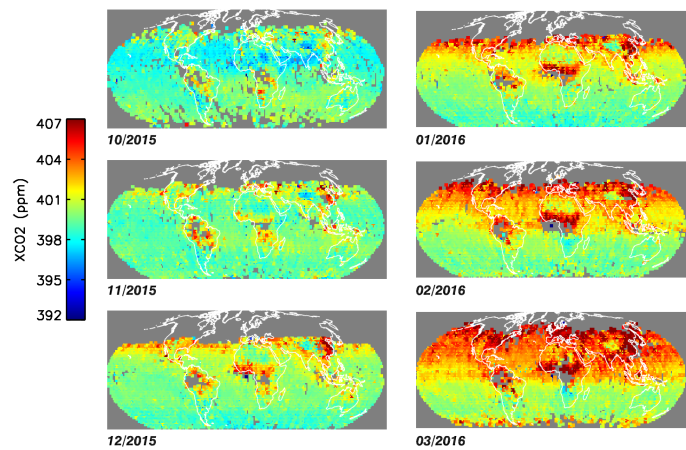

2

3 Figure 5. Maps of  $X_{CO_2}$  from OCO-2 from October 2015 through March 2016, bias corrected and selected with data quality flag  
4 and averaged on 2 degree by 2 degree grid.

5

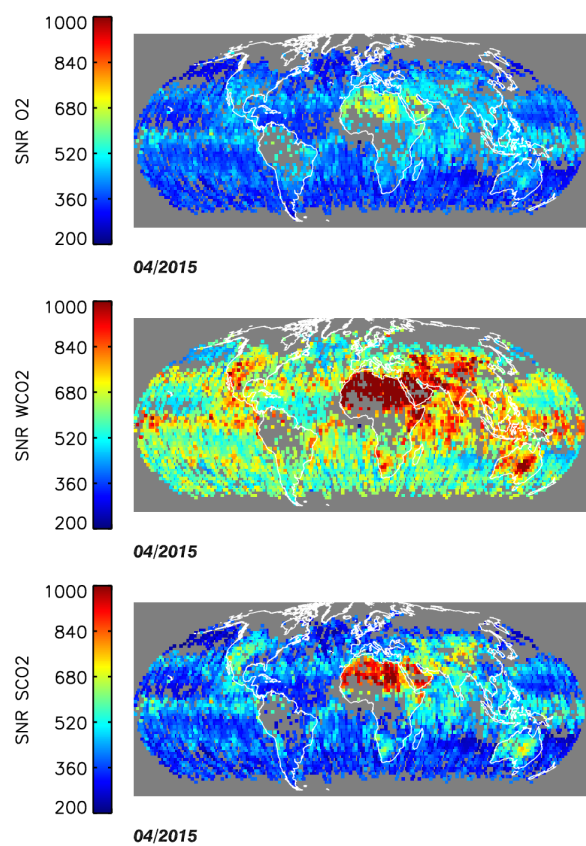

1  
 2 Figure 6. Maps of the continuum signal to noise ratio for the three bands of the OCO-2 instrument in April 2015. Statistics are  
 3 provided for 2 degree by 2 degree bins for data selected with the data quality flag.

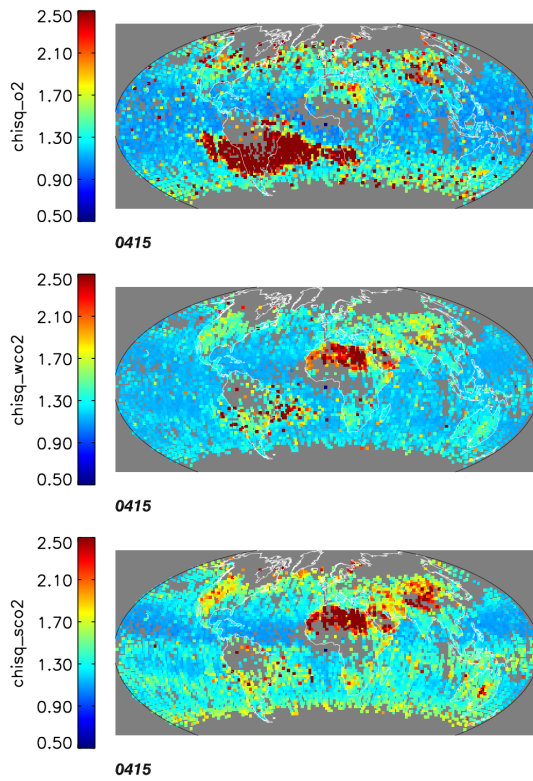

1  
2 Figure 7. Maps of the fitting parameter  $\chi^2$  three bands of the OCO-2 instrument in April 2015. Statistics are provided for 2 degree  
3 by 2 degree bins for data selected with the data quality flag.  
4

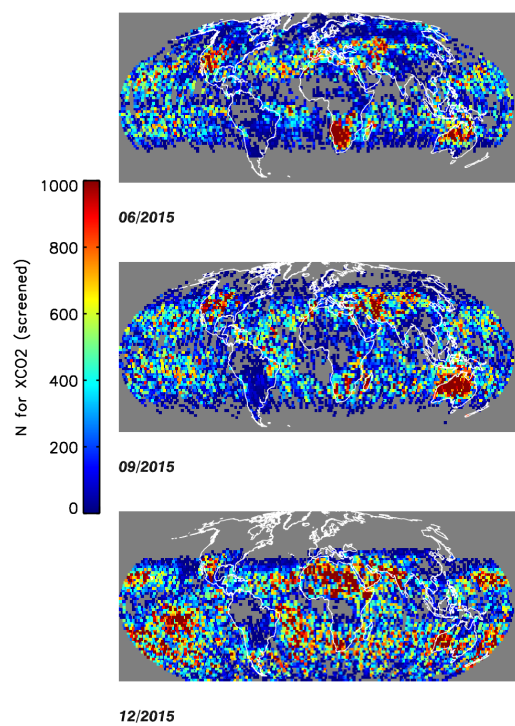

1  
2 Figure 8. Maps of the number of soundings passing quality flagging for a selection of months. Statistics are provided for 2 degree  
3 by 2 degree bins for data selected with the data quality flag.  
4

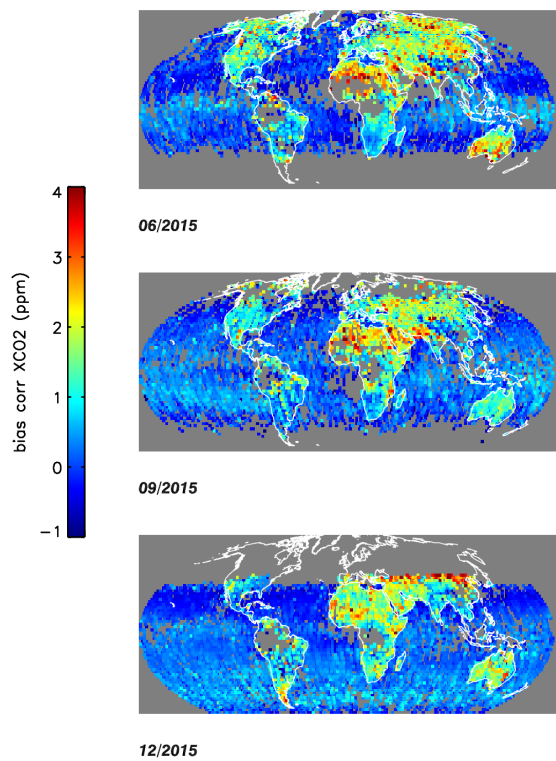

1  
2 Figure 9. Maps of the bias correction applied to the  $X_{CO_2}$  data. Statistics are provided for 2 degree by 2 degree bins for data selected  
3 with the data quality flag.

4  
5



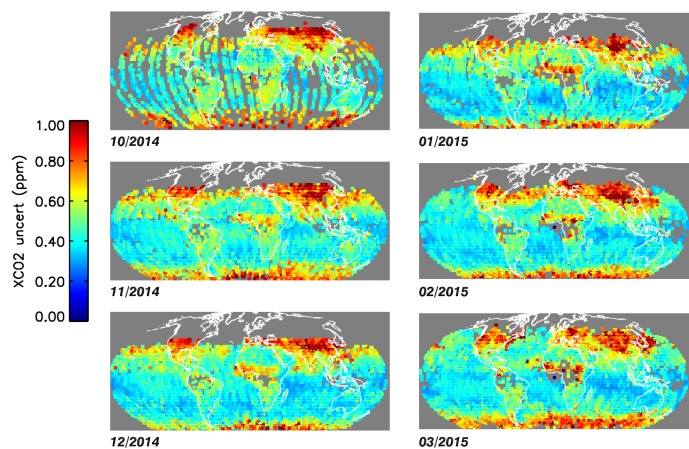

1  
2 Figure 10. Maps of the average  $X_{CO_2}$  uncertainty in the OCO-2 data product. Statistics are provided for 2 degree by 2 degree bins  
3 for data selected with the data quality flag.  
4

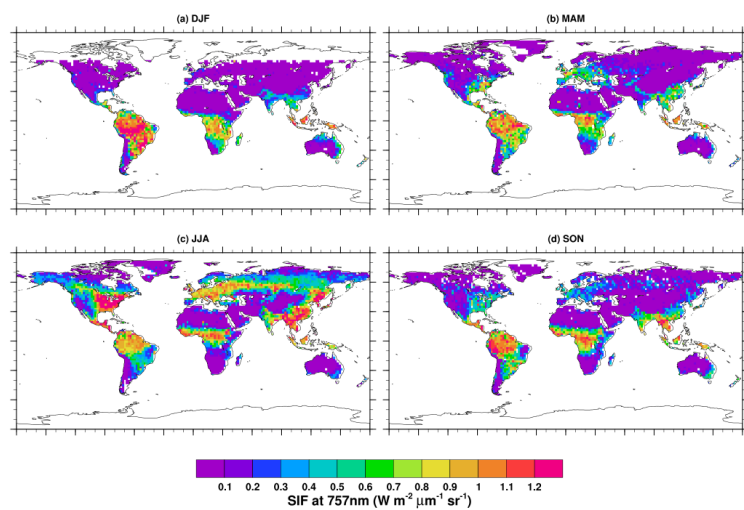

1  
 2 Figure 11 – OCO-2 Solar Induced Fluorescence (SIF) product averaged on 2 degree by 2 degree grid for 3 month periods (December  
 3 2014 through November 2015).

4  
 5

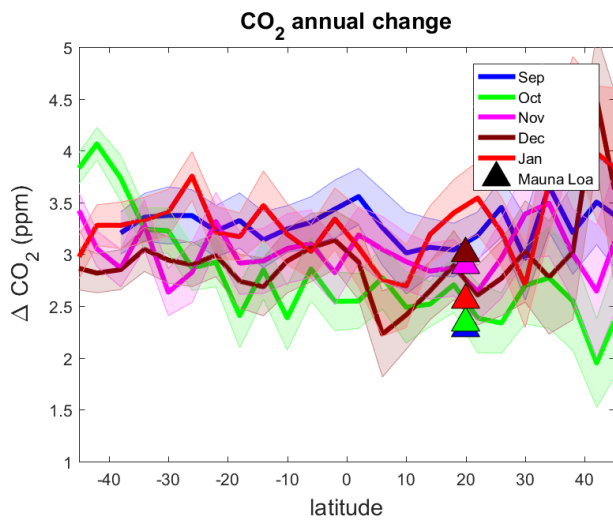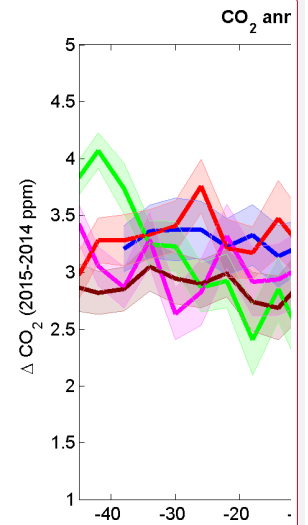

Deleted:

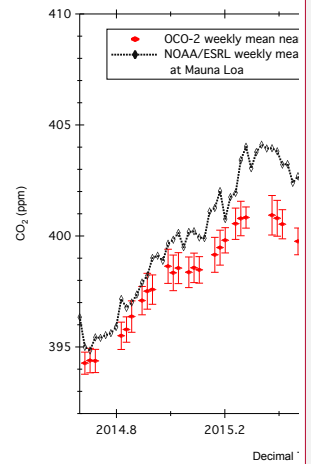

Deleted:

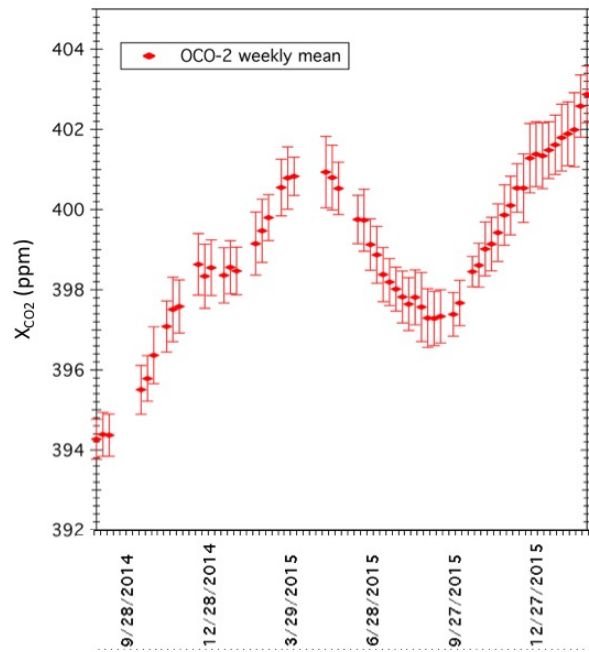

Figure 13 – Time series of weekly average OCO-2 X<sub>CO2</sub> measurements near Hawaii. Glint water measurements selected with the data quality flag from the Lite files.

Formatted: Centered

**Deleted:** NOAA ESRL Mauna Loa Observatory weekly average CO<sub>2</sub> concentrations are overplotted in a black dashed line

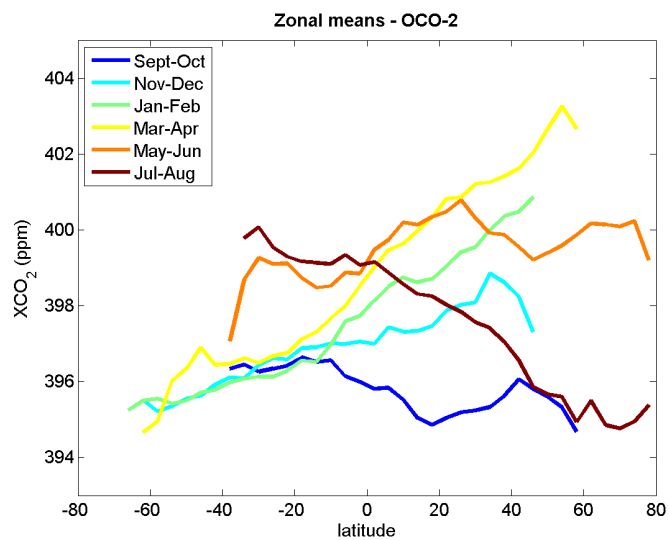

1  
2 Figure 14: Latitudinal gradient for 2 month averages of OCO-2 X<sub>CO2</sub> data between September 2014 and August 2015. All modes  
3 are averaged together in these figures.  
4  
5

## Latitudinal gradient

The OCO-2 record adds additional detail to our understanding of the latitudinal gradients of  $X_{\text{CO}_2}$ . Figure 14 shows the zonal means of quality flagged OCO-2  $X_{\text{CO}_2}$  data. As expected, there is a complete reversal of the latitudinal gradient between Northern Hemisphere spring and Northern Hemisphere summer. We see the contrast of the March-April 2015 gradient, where the Northern Hemisphere has  $X_{\text{CO}_2}$  concentrations 4 to 7 ppm larger than the Southern Hemisphere, whereas the reverse is seen in July - August. The southern hemisphere gradient is similar from September through April. The seasonal change of latitudinal coverage is also apparent in this plot, driven by both solar geometry and clouds, as discussed earlier. Wunch et al. (2016) shows comparisons of the latitudinal gradients as observed by OCO-2 and TCCON.
